# Supplementary material for: Wet adhesive hydrogels based on niobium carbide for experimental research of oral mucosal impairment
Source: Royal Society of Chemistry journal article supplement (doi:10.1039/d4ra01352b), 2024-01-01
Supplement: d4ra01352b1.pdf [file d4ra01352b1.pdf]

## Supporting Information

### **Wet adhesive hydrogels based on niobium carbide for experimental research of oral mucosal impairment**

Jiayuan Chen<sup>a, 1</sup>, Junyu Ren<sup>b, 1</sup>, Yingjie Wu<sup>c</sup>, Narisu Hu<sup>b, \*</sup>, Fang Zhao<sup>d, \*</sup>,  
Lin Zhang<sup>a, \*</sup>

<sup>a</sup> First Affiliated Hospital of Harbin Medical University, College of Stomatology, Harbin Medical University, No. 143 Yiman Street, Nangang District, Harbin, 150001, China.

<sup>b</sup> Oral Implant Center, Second Affiliated Hospital of Harbin Medical University, Harbin Medical University, Harbin, Heilongjiang, China.

<sup>c</sup> Key Laboratory of Microsystems and Microstructures Manufacturing (Ministry of Education), School of Medicine and Health, Harbin Institute of Technology, No. 92 XiDaZhi Street, Harbin, 150001, China.

<sup>d</sup> Department of Dentistry, Second Affiliated Hospital of Harbin Medical University, Harbin Medical University, Harbin, Heilongjiang, China.

<sup>1</sup> These authors contributed equally to this work

\*Corresponding authors

E-mails: [hmuhunarisu@163.com](mailto:hmuhunarisu@163.com); [dentistzhaofang@163.com](mailto:dentistzhaofang@163.com); [cczhlin@163.com](mailto:cczhlin@163.com)

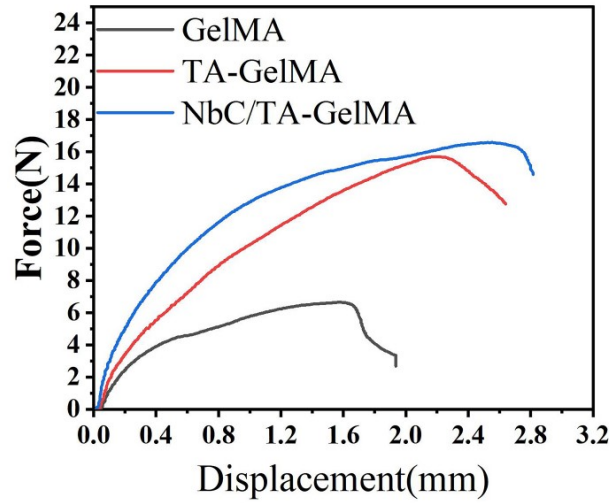

Fig. S1. Force-Displacement curves of different hydrogels.

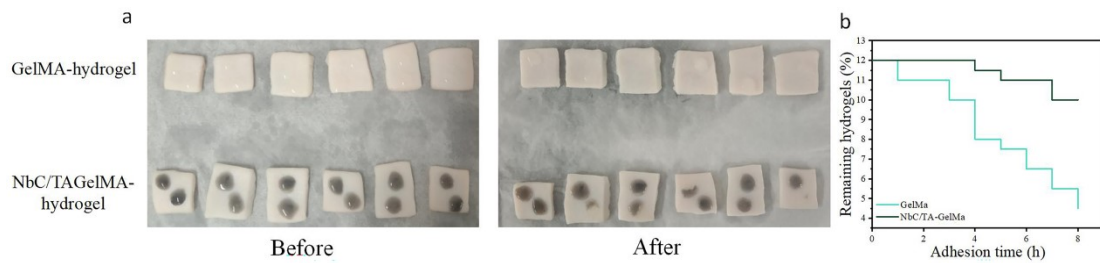

Fig. S2. The quantities of two hydrogels before and after stirring.

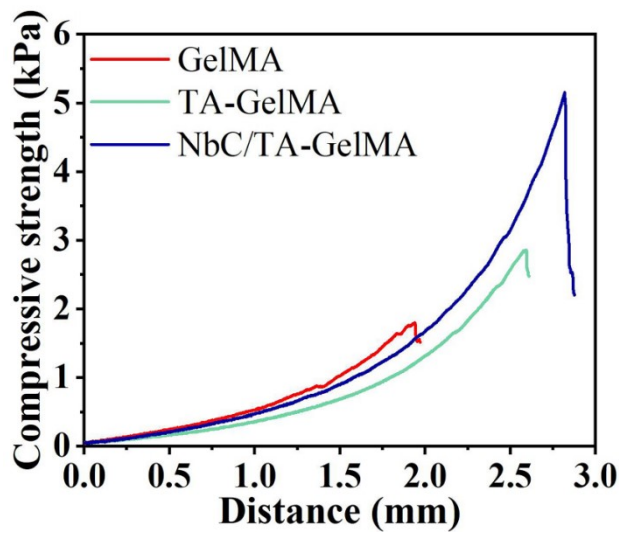

Fig. S3. Compressive strength-distance curves of GelMA, TA-GelMA, NbC/TA-GelMA hydrogels.

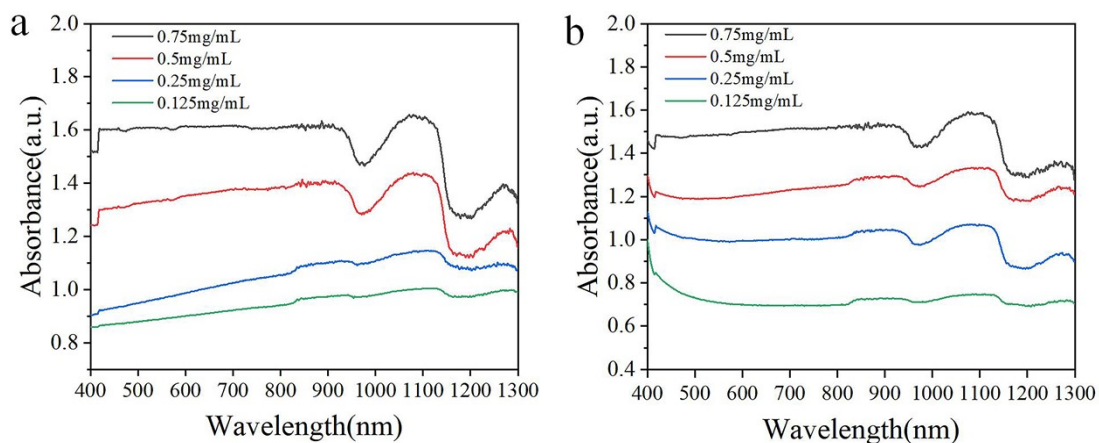

Fig. S4. Visible-NIR absorption spectra of (a) different concentrations of NbC and (b) NbC/TA-GelMA hydrogels with different concentrations of NbC.

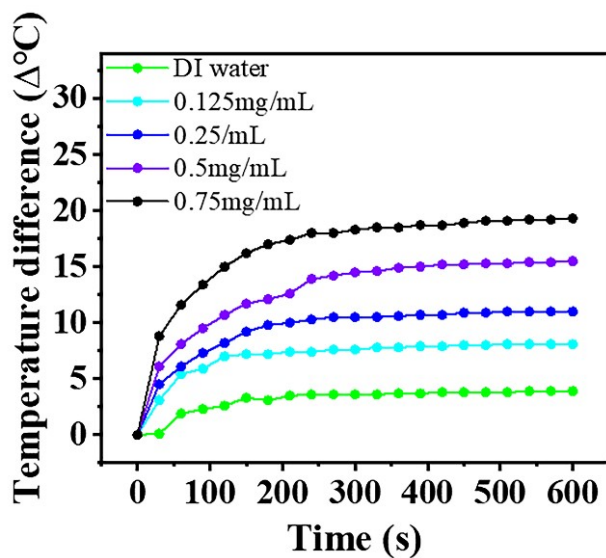

Fig. S5. Heating curves of different concentrations of NbC nanoparticles.

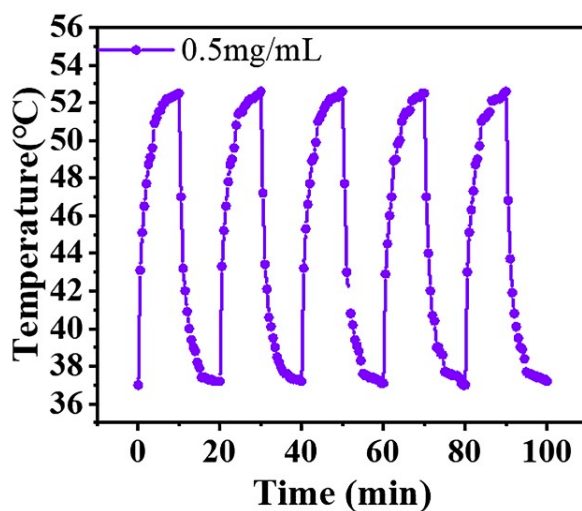

Fig. S6. Temperature cycling diagram of NbC nanoparticles at a concentration of 0.5 mg/mL.

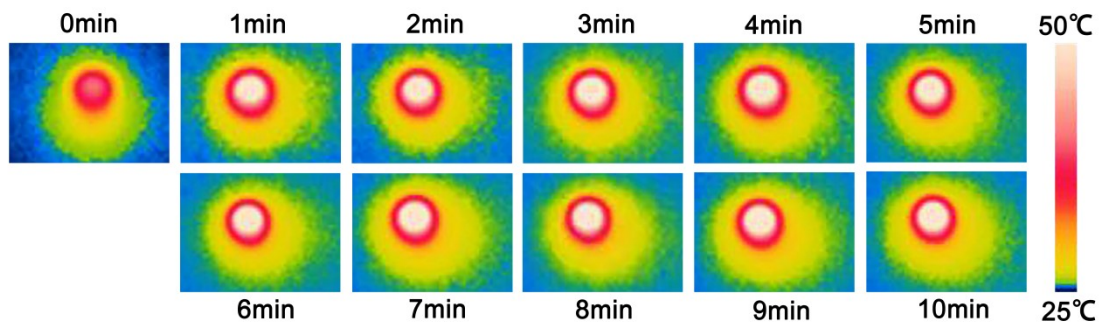

Fig. S7. NIR images of NbC/TA-GelMA hydrogels with 0.75 mg/mL concentration of NbC.

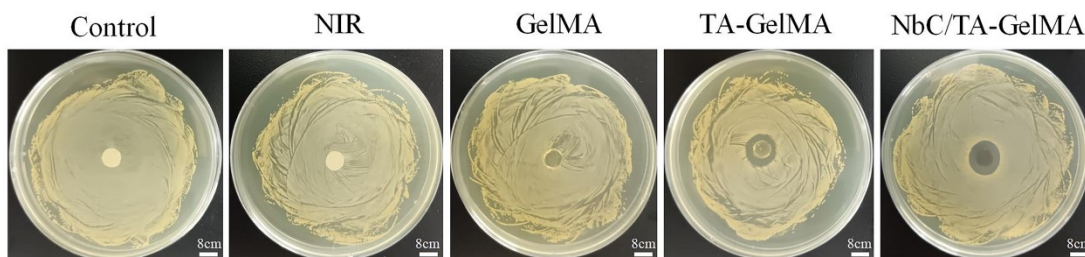

Fig. S8. Zone of inhibition assay of different groups.

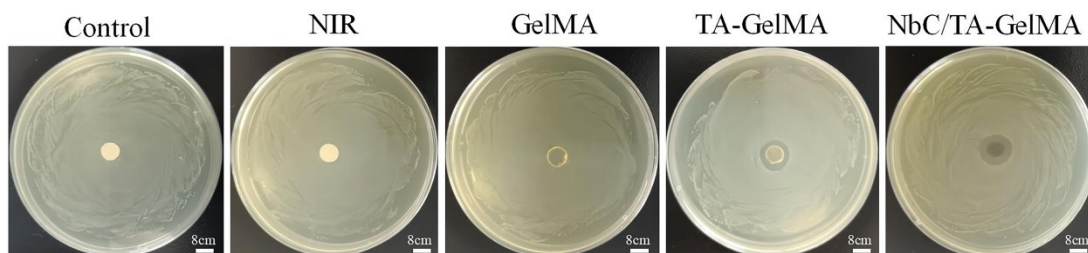

Fig. S9. Zone of inhibition assay of different groups.

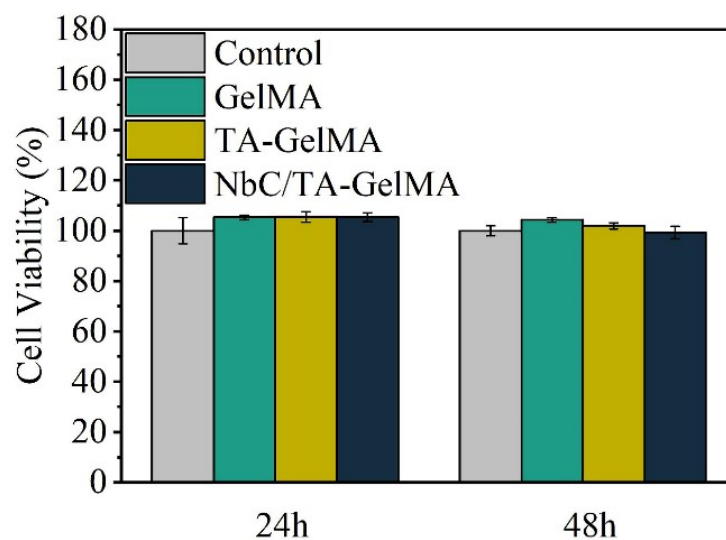

Fig. S10. Viability of HOK in each group.
